# Supplementary material for: One-pot synthesis and enhanced catalytic performance of Pd and Pt nanocages via galvanic replacement reactions
Source: Royal Society of Chemistry journal article supplement (doi:10.1039/c3ra23273e), 2013-01-01
Supplement: c3ra23273e.pdf [file c3ra23273e.pdf]

# **One-pot synthesis and enhanced catalytic performances of Pd and Pt nanocages *via* Galvanic Replacement Reactions**

**Rong Wu<sup>#</sup>, Qing-Cheng Kong<sup>#</sup>, Chenglin Fu, Shi-Qin Lai, Cui Ye, Jian-Yu Liu\*,  
Yongxiang Chen, Jian-Qiang Hu\***

Key Lab for Fuel Cell Technology of Guangdong Province, Department of Applied Chemistry, College of Chemistry and Chemical Engineering, South China University of Technology, Guangzhou 510640, China

Tel & Fax: +86 20 2223 6670

E-mail: jqhusc@scut.edu.cn; jyliu@scut.edu.cn

<sup>#</sup> Rong Wu and Qing-Cheng Kong contributed equally to this work

## **Electronic Supplementary Information**

## Experimental details

**Materials.** Silver nitrate ( $\text{AgNO}_3$ ), palladium chloride ( $\text{PdCl}_2$ ), chloroauric acid ( $\text{HAuCl}_4$ ), cetyltrimethylammonium bromide (CTAB), and poly(vinyl pyrrolidone) (PVP, MW=30,000) were obtained from Sigma-Aldrich. Other analytical grade reagents came from Guangdong Guanghua Chemical Reagent Co., such as ethylene glycol ( $\text{HOCH}_2\text{CH}_2\text{OH}$ , EG), acetylacetone ( $\text{CH}_3\text{COCH}_2\text{COCH}_3$ , acac), methanol, chloroplatinic acid ( $\text{H}_2\text{PtCl}_6 \cdot 6\text{H}_2\text{O}$ ), ascorbic acid (AA), sodium chloride (NaCl), sodium hydroxide (NaOH), ferric nitrate ( $\text{Fe}(\text{NO}_3)_3$ ), sodium sulfide ( $\text{Na}_2\text{S}$ ) and concentrated sulfuric acid ( $\text{H}_2\text{SO}_4$ ). All the reagents were used without further purification. Milli-Q water ( $> 18.0 \text{ M}\Omega \text{ cm}$ ) was used to prepare all aqueous solutions.

**Synthesis of Ag nanocubes solution.** Ag nanocubes solution were synthesized by the reduction of  $\text{AgNO}_3$  with EG in the presence of PVP and  $\text{Na}_2\text{S}$ .<sup>1</sup> Briefly, 0.166 g PVP was dissolved in 3 mL EG solution. Then, 60  $\mu\text{L}$  0.01 M  $\text{Na}_2\text{S}$  was introduced into the solution and kept stirring and refluxing for 5 min at 150 °C. Next, 3 mL 0.1 M  $\text{AgNO}_3$  EG solution was slowly dripped. Finally, the Ag nanocubes solution was obtained through stirring and refluxing the mixture for 1.5 h at 175 °C.

**Synthesis of metal (Au, Pd, Pt) nanocages.** Metal (Au, Pd, Pt) nanocages were synthesized by galvanic replacement reactions of Ag nanocubes served as templates. Firstly, Ag nanocubes were synthesized by the reduction of  $\text{AgNO}_3$  with EG in the presence of PVP and  $\text{Na}_2\text{S}$ . Meanwhile, 2.5 mM  $\text{Au}(\text{acac})_4^{3+}$ ,  $\text{Pd}(\text{acac})_2^{2+}$ , or  $\text{Pt}(\text{acac})_4^{4+}$  precursor solutions were prepared through mixing  $\text{HAuCl}_4$ ,  $\text{PdCl}_2$ , or  $\text{H}_2\text{PtCl}_6$  and acac solutions under vigorously stirring, respectively. Without centrifugation and separation, the freshly prepared nanocubes were cooled down to 120 °C, and 3 mL of 2.5 mM  $\text{Au}(\text{acac})_4^{3+}$ ,  $\text{Pd}(\text{acac})_2^{2+}$ , or  $\text{Pt}(\text{acac})_4^{4+}$  precursors were added through a syringe pump at the rate of 45 mL/h under continuously stirring. Next, the reaction mixture kept stirring at 120 °C for 1.5 h. Finally, the metal nanocages were obtained through dealloying with an overdose volume of 50 mM  $\text{Fe}(\text{NO}_3)_3$  and washing with saturated NaCl solutions to remove AgCl and centrifuging several times to remove PVP and NaCl.<sup>2</sup>

**Synthesis of Pd nanocubes.** As control experiment, Pd nanocubes were synthesized as follow:<sup>3</sup> 10 mM  $\text{Na}_2\text{PdCl}_4$  solution was first prepared by dissolving 44.5 mg  $\text{PdCl}_2$  in 5 mL 100 mM HCl and 19 mL ultrapure water, followed by the addition of 1 mL 500 mM NaOH. Then, 1 mL 10 mM  $\text{PdCl}_2$  was mixed with 1 mL 10 mM CTAB, and the mixture was dropped into a flask containing 4 mL 25 mM AA over a period of 5 min and kept stirring for 1 h. Finally, the product was obtained through centrifuging and dispersing twice at 4000 rpm for 20 min.

**Synthesis of Pt nanoparticles.** As control experiment, Pt nanoparticles were prepared by seed-mediated growth strategy.<sup>4</sup> Briefly, Pt seeds were first fabricated through refluxing 50 mL solution containing 6 mM  $\text{H}_2\text{PtCl}_6$ , 0.6 mM PVP, 9.5 mL ultrapure water, and 40.5 mL methanol

for 3 h.<sup>5</sup> Then, 2 mL Pt seeds were added into 10 mL 2 mM H<sub>2</sub>PtCl<sub>6</sub>, and the mixture was reduced with 2.4 mL 100 mM AA. The final product was acquired through centrifuging twice at 6000 rpm for 30 min.

**Preparation of catalyst modified electrodes.** Glassy carbon (GC) electrodes were first polished with alumina slurry of successively smaller particles (1.0, 0.3, and 0.05 μm diameters), respectively, and cleaned by ultrasonication. Then, 6 μL of 2 mg/mL catalyst solutions was deposited on the GC electrode surfaces with a 10-μL syringe and was allowed to dry at room temperature. Finally, uniform catalyst-nafion/GC modified electrodes were formed through casting 3 μL of 5% nafion onto the catalyst-modified electrode surfaces and putting overnight at room temperature.

**Electrochemical measurements.** All electrochemical experiments were conducted at (25 ± 2) °C with a CH Instruments (CHI 660C) electrochemical analyzer in a three electrode system with the modified GC electrode as the working electrode, a platinum wire as the auxiliary electrode and an Ag/AgCl (saturated KCl) electrode as the reference electrode, respectively. Methanol electrocatalytic oxidation measurements were performed in 0.5 M KOH solution containing 1 M methanol at the scan rate of 50 mV/s. All electrochemical experiments were commenced after degassing the electrolyte solutions with nitrogen for at least 20 min prior to measurements.

**Instrumentation.** Transmission electron microscopy (TEM) studies were performed by using a Hitachi H-7500 microscope operated at 80 kV. High-resolution TEM (HRTEM) was carried out with a JEM-2010 (HR) microscopy operated at 200 kV. X-ray diffraction (XRD) pattern was recorded on a powder sample using a D/max-III A (Japan) X-ray diffractometer with graphite monochromatized Cu Kα radiation (λ=0.15418 nm) in ranging from 10° to 90°. X-ray photoelectron spectroscopy (XPS) measurement was performed using a Kratos Axis Ultra (DLD). UV-visible (UV-vis) absorption spectrum was acquired with a Hewlett-Packard 8452 diode array spectrometer (U-3010). Electrochemical experiments were carried out at room temperature using a CHI 660 electrochemical workstation (CH Instruments, Inc., Austin, USA)

## References

1. S. K. Siekkinen, J. M. McLellan, J. Y. Chen and Y. N. Xia, *Chem. Phys. Lett.*, 2006, **432**, 491.
2. X. M. Lu, L. Au, J. McLellan, Z. Y. Li, M. Marquez and Y. N. Xia, *Nano Lett.*, 2007, **7**, 1764.
3. F. R. Fan, A. Attia, U. K. Sur, J. B. Chen, Z. X. Xie, J. F. Li, B. Ren and Z.Q Tian, *Cryst. Growth Des.*, 2009, **9**, 2335.
4. H. P. Liang, H. M. Zhang, J. S. Hu, Y. G. Guo, L. J. Wan and C. L. Bai, *Angew. Chem. Int. Ed.*, 2004, **43**, 1540.
5. T. Teranishi, M. Hosoe, T. Tanaka and M. Miyake, *J. Phys. Chem. B.*, 1999, **103**, 3818.

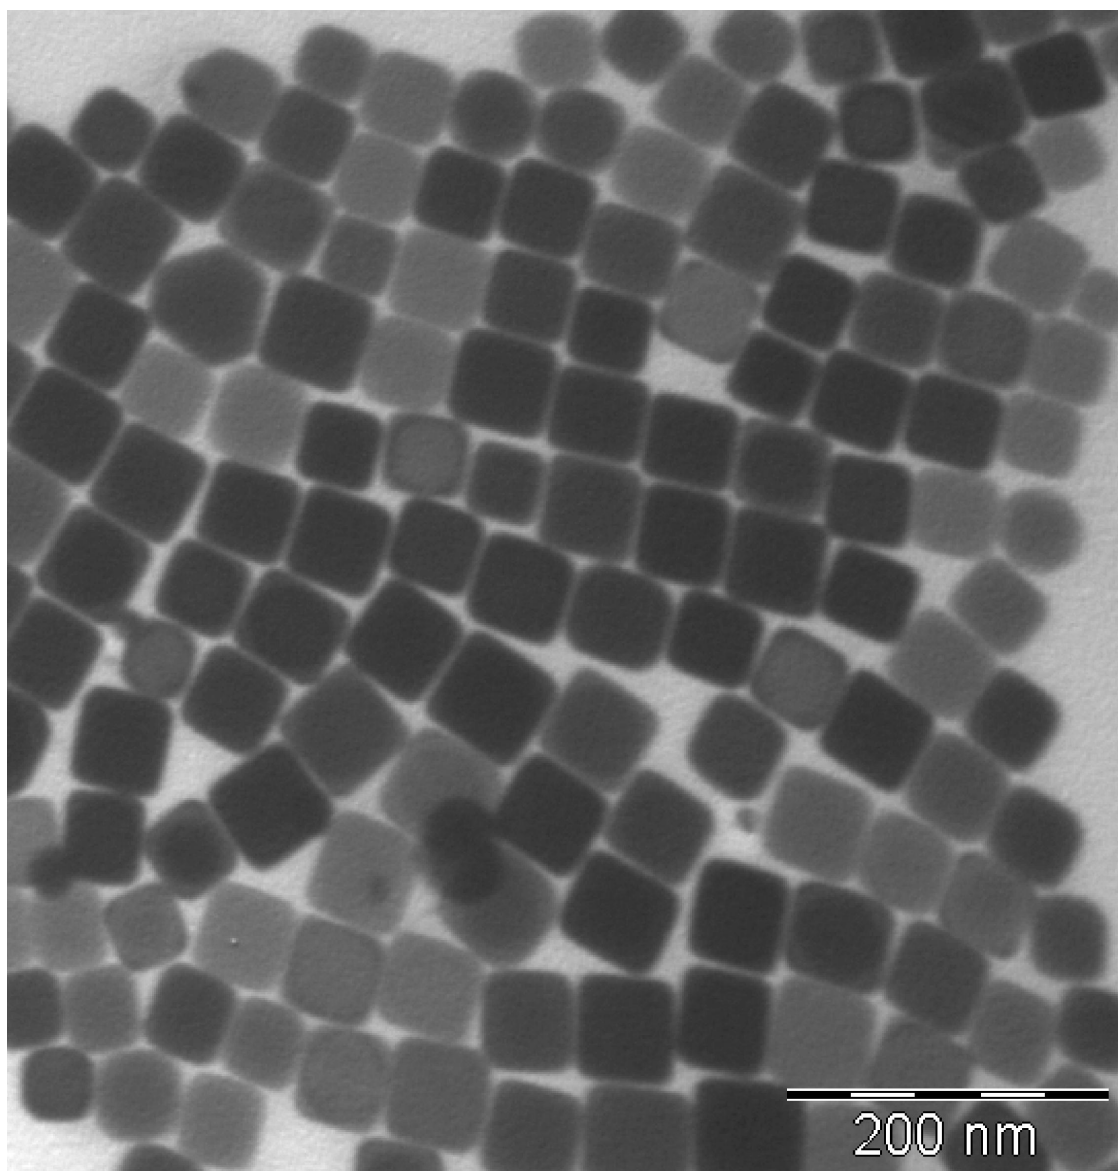

**Fig. S1** TEM image of Ag nanocubes prepared by the glycol reduction method. Scale bar: 200 nm.

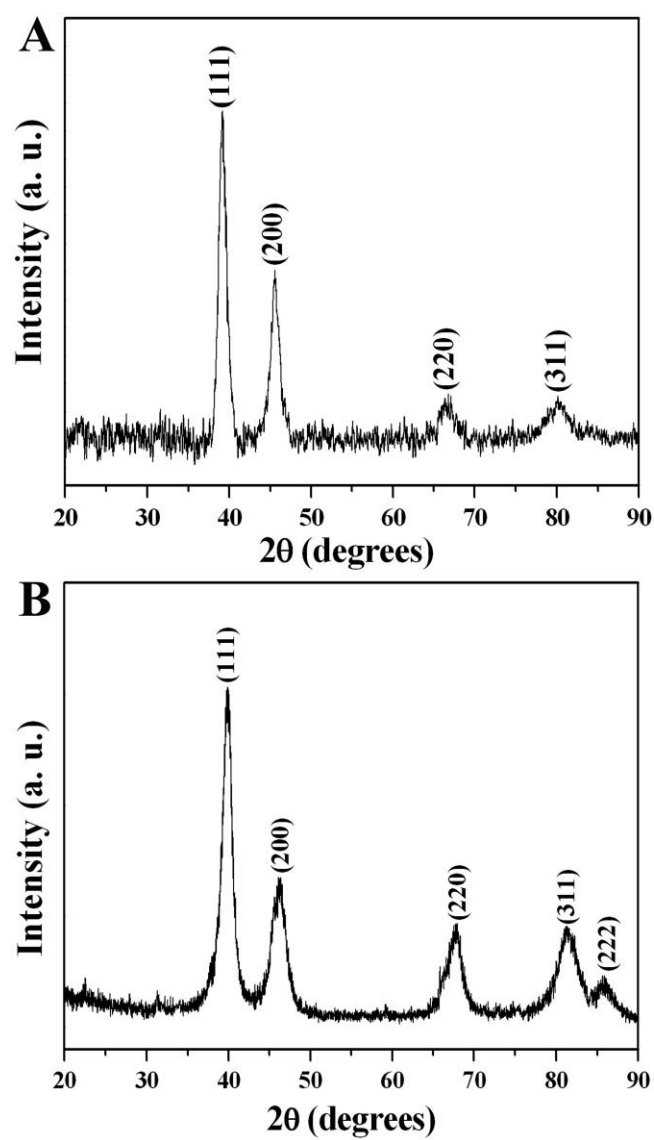

**Fig. S2** (A,B) XRD patterns of Pd and Pt nanocages prepared by the present one-pot strategy, respectively.

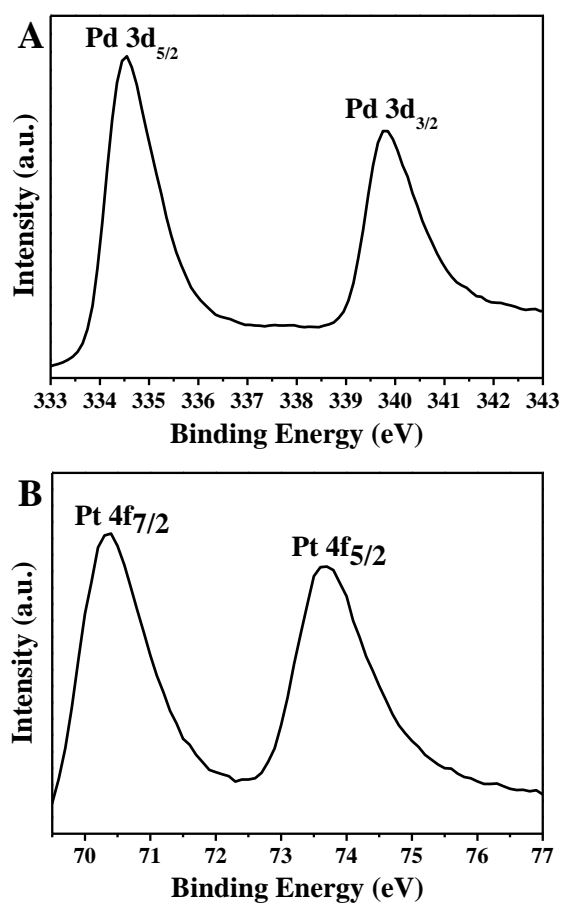

**Fig. S3** XPS spectra of (A) Pd and (B) Pt nanocages prepared by the present one-pot strategy.

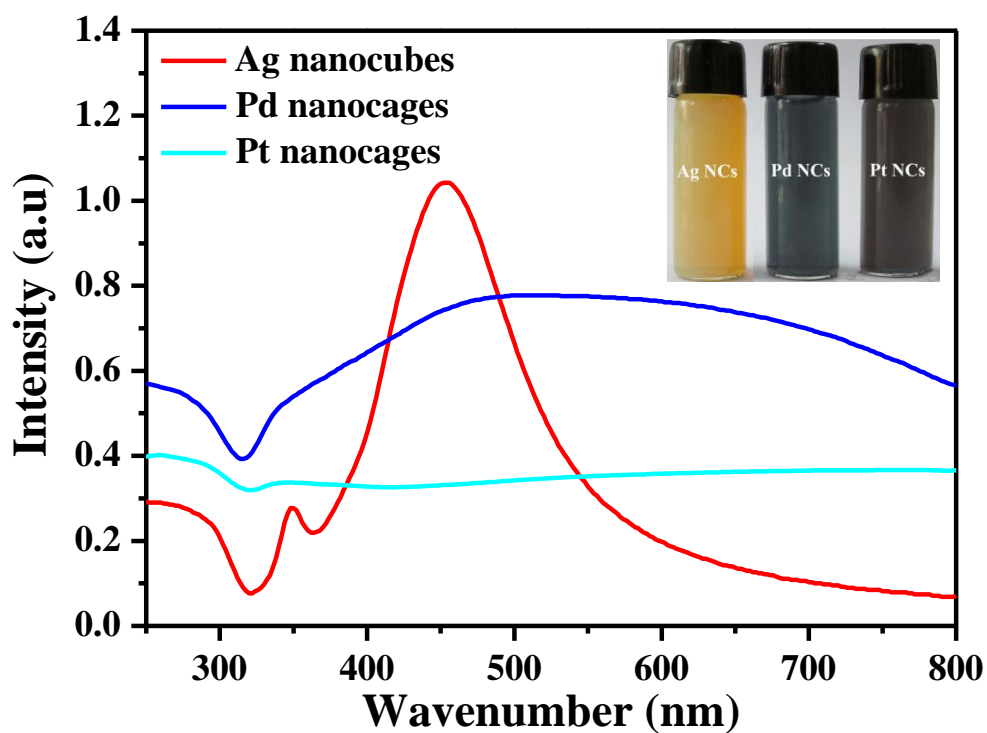

**Fig. S4** UV-visible spectra of colloidal solutions containing Ag nanocubes and Pd and Pt nanocages prepared by the present one-pot strategy, respectively. The inset is their corresponding digital photos.

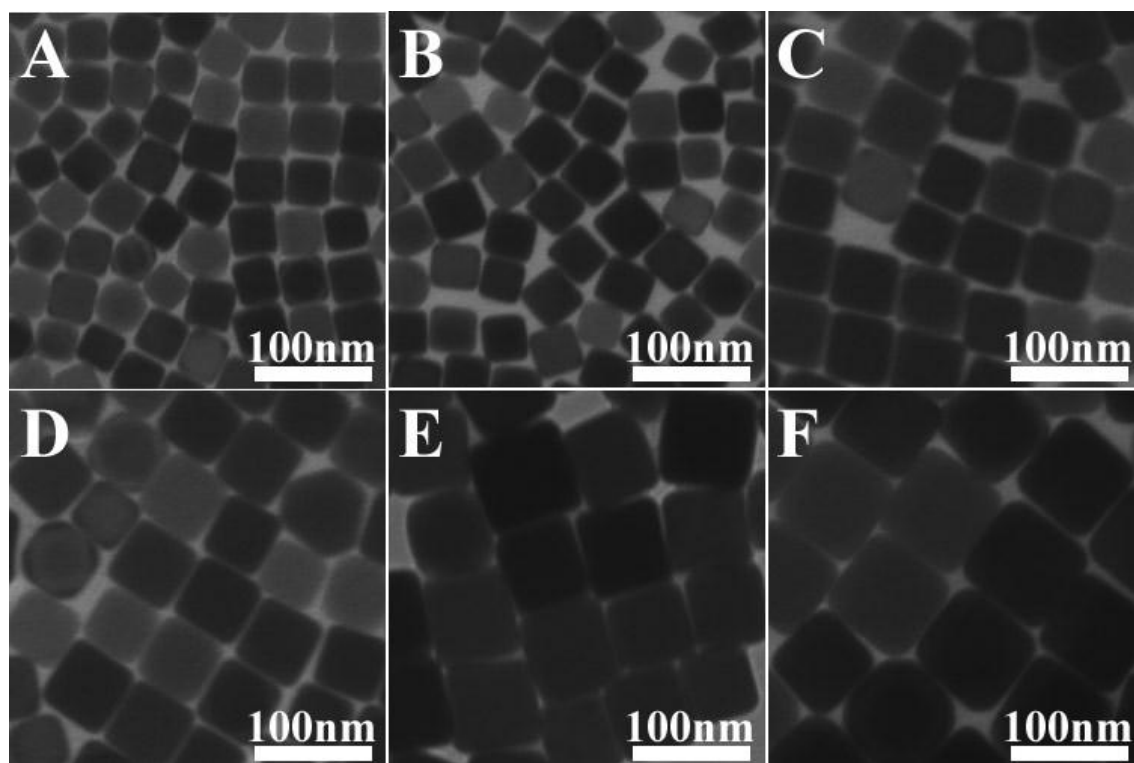

**Fig. S5** TEM images of Ag nanocubes prepared using (A) 30, (B) 60, (C) 120, (D) 150, (E) 180, and (F) 240  $\mu\text{L}$  0.01 M  $\text{Na}_2\text{S}$ , respectively. Scale bar: 100 nm.

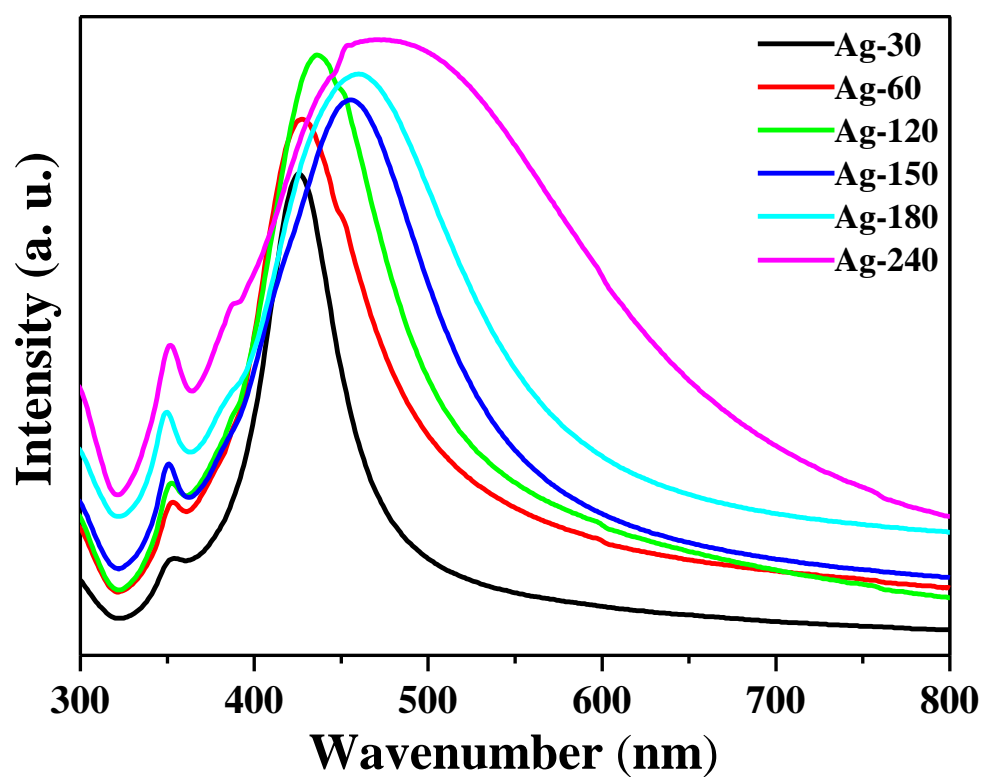

**Fig. S6** UV-visible absorption spectra of the colloidal solutions containing the Ag nanocubes prepared using 30 (black), 60 (red), 120 (green), 150 (blue), 180 (cyan) and 240 (magenta)  $\mu\text{L}$  0.01 M  $\text{Na}_2\text{S}$ , respectively.

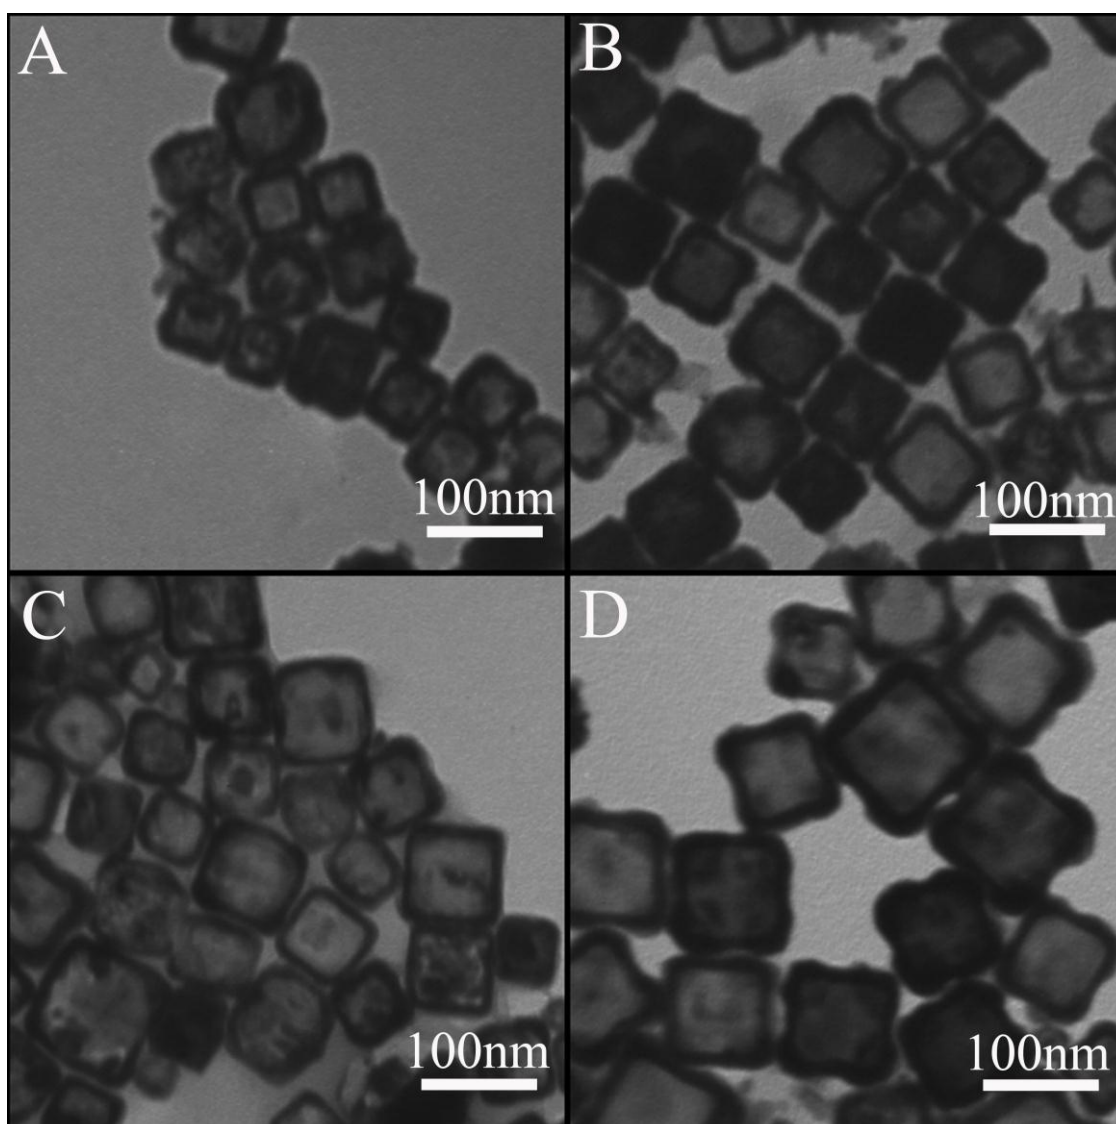

**Fig. S7** TEM images of Pd nanocages prepared using the templates of Ag nanocubes with the edge lengths of (A) 51, (B) 57, (C) 67, and (D) 84 nm, respectively. Scale bar: 100 nm.

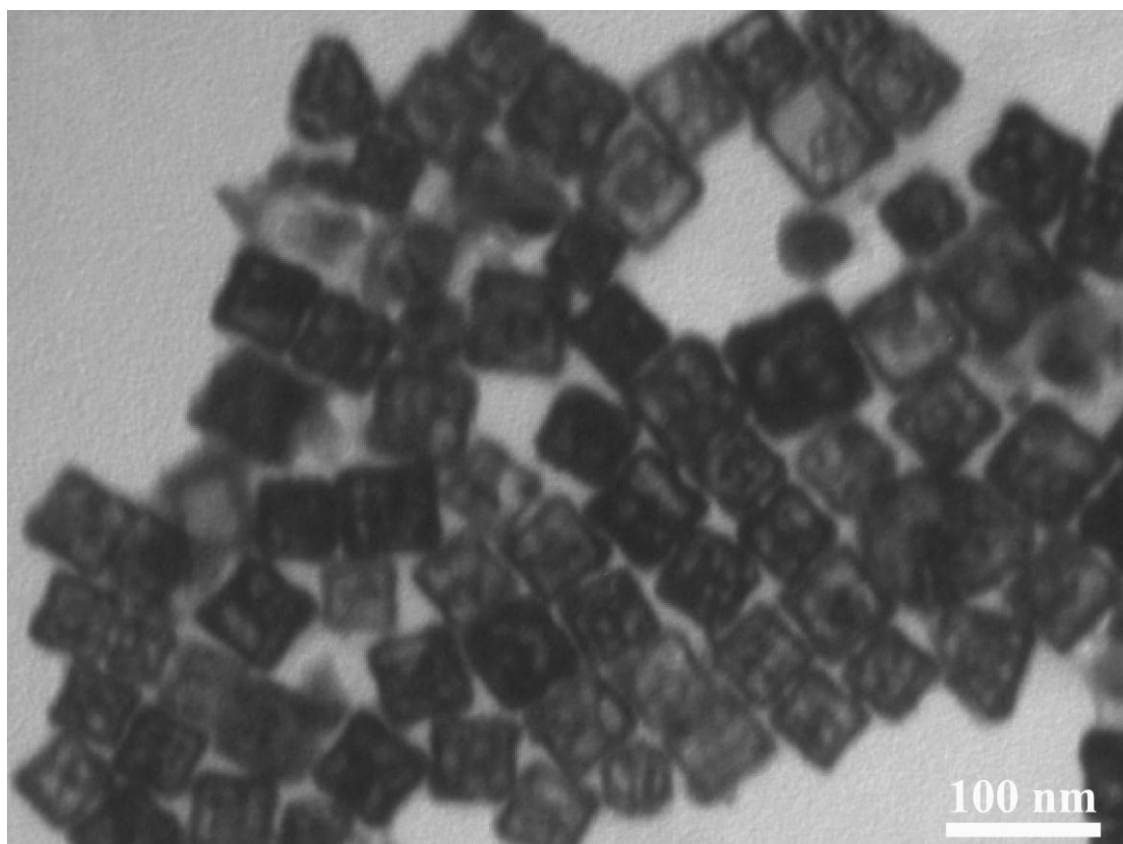

**Fig. S8** TEM images of Pd nanocages prepared via the templates of the Ag nanocubes at the temperature of 70 °C. Scale bar: 100 nm.

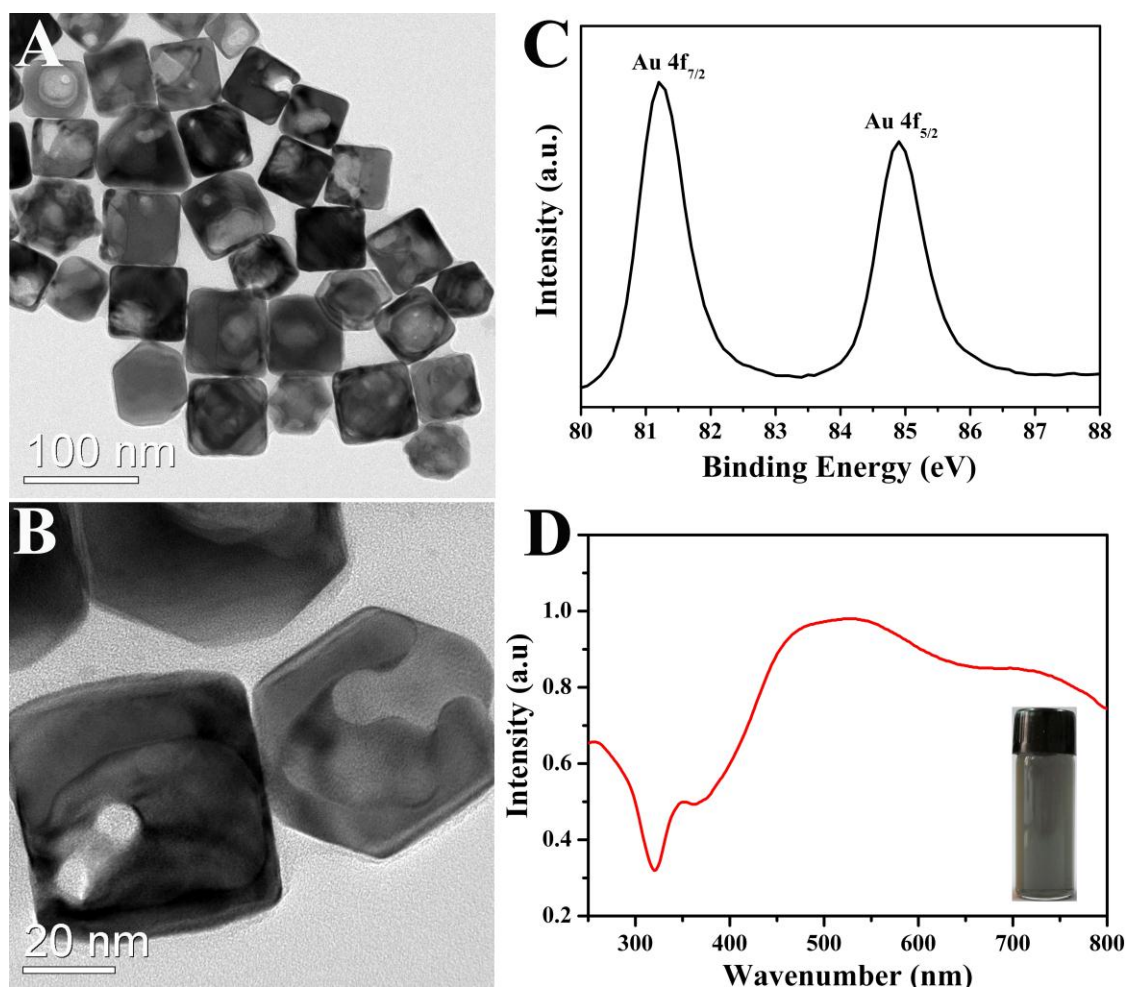

**Fig. S9** (A) TEM and (B) HRTEM images and (C) XPS and (D) UV-visible spectra of Au nanocages prepared by the one-spot strategy, respectively. Scale bar: 100 and 20 nm; the inset is its corresponding digital photo.

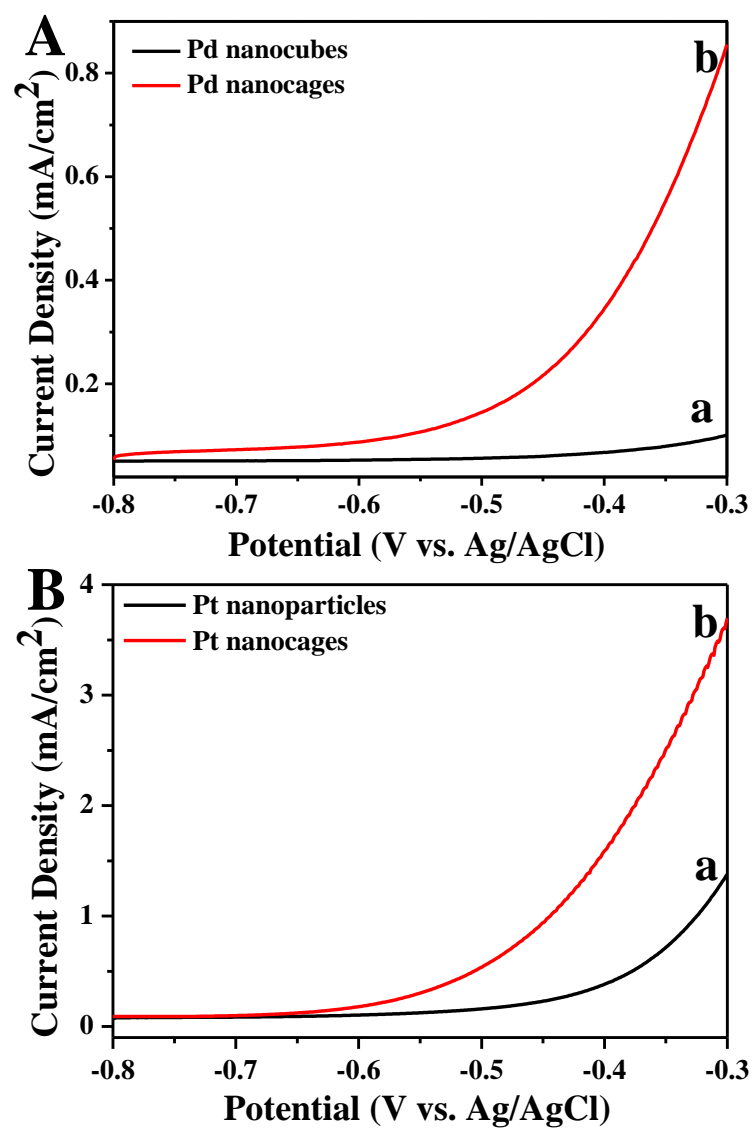

**Fig. S10** Linear sweep voltammetry (LSV) of (A) Pd nanocubes (a) and Pd nanocages (b) and (B) Pt nanoparticles (a) and Pt nanocages (b) catalysts modified electrodes in 1 M CH<sub>3</sub>OH + 0.5 M KOH at the scan rate of 50 mV/s, respectively.

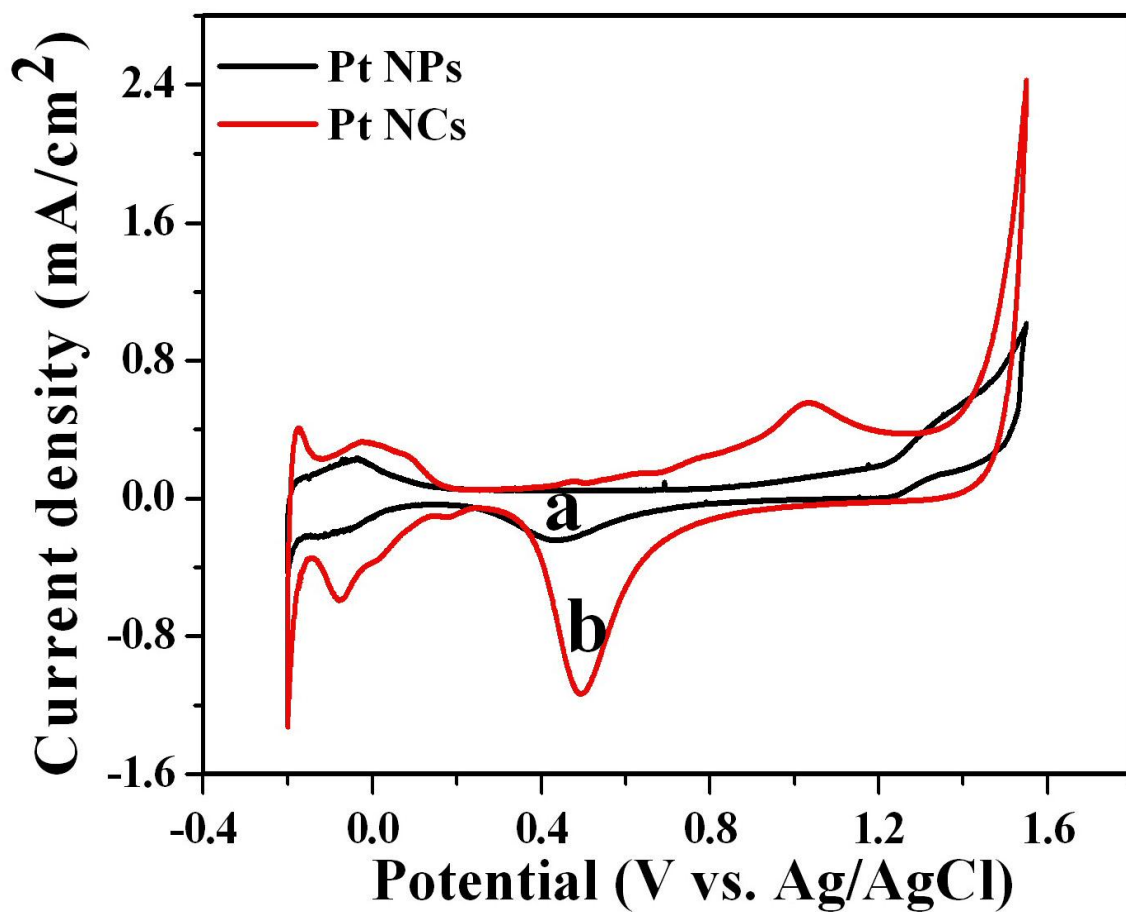

**Fig. S11** Cyclic voltammograms of (a) Pt nanoparticles and (b) Pt nanocages in nitrogen-saturated 0.5 M H<sub>2</sub>SO<sub>4</sub> at a scan rate of 50 mV/s.
